# THE JOURNAL OF NEUROPSYCHIATRY and Clinical Neurosciences

The Official Journal of the American Neuropsychiatric Association

## In this issue:

- Does Cognitive Behavioral Therapy Change the Brain? A Systematic Review of Neuroimaging in Anxiety Disorders
- Changes in Relative Glucose Metabolic Rate Following Cortisol Administration in Aging Veterans with Posttraumatic Stress Disorder: An FDG-PET Neuroimaging Study
- Double-Blind Treatment of Apathy in Patients with Poststroke Depression Using Nefiracetam
- Atrophy of Basal Ganglia Nuclei and Negative Symptoms in Temporal Lobe Epilepsy

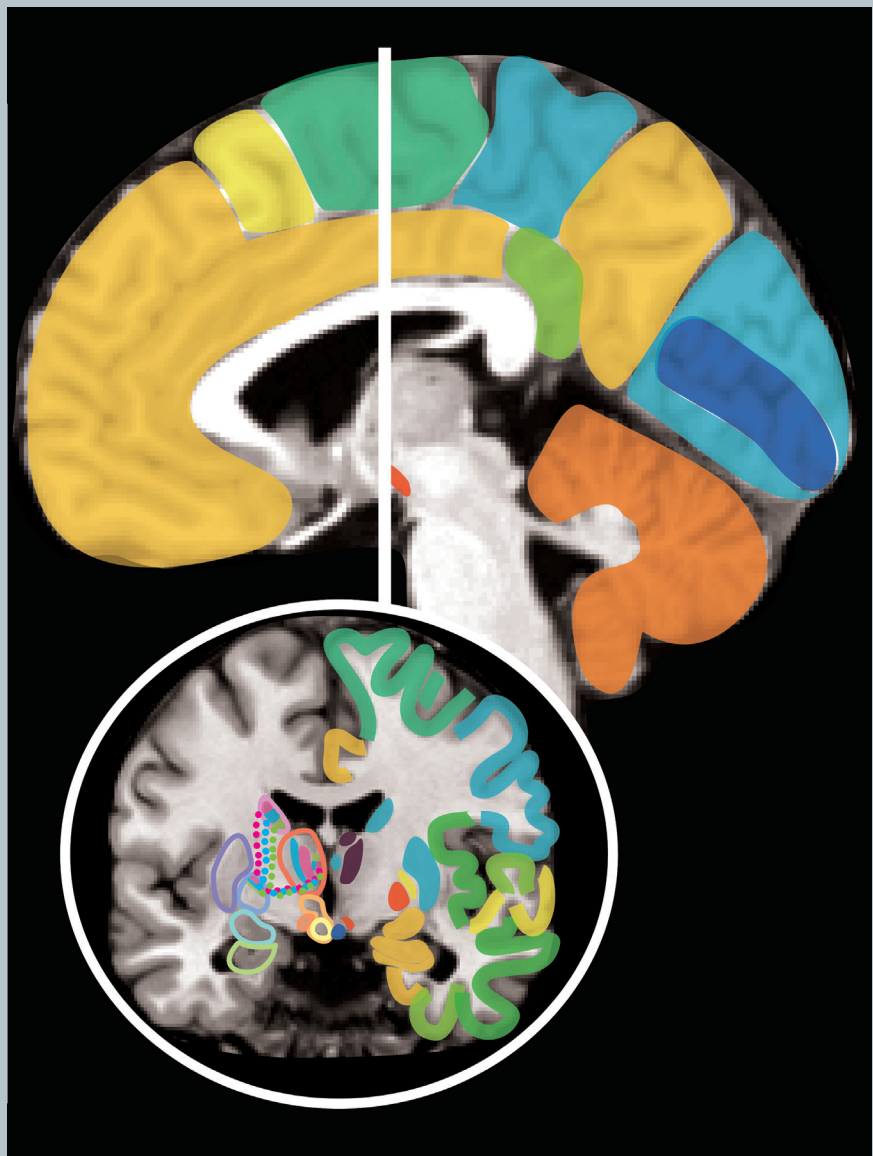

Source: https://neuro.psychiatryonline.org/doi/suppl/10.1176/jnp.2009.21.issue-2/suppl_file/cover.pdf
