**VICE CHAIR FOR ACADEMIC CLINICAL SERVICES**  
**DEPARTMENT OF PSYCHIATRY**  
**BRIGHAM AND WOMEN'S/FAULKNER HOSPITALS**

Brigham and Women's/Faulkner Hospital, a teaching affiliate of Harvard Medical School and a founding member of the Partners Healthcare System, is seeking a master clinician-educator-investigator who will play a key role in the oversight, further strategic development, and alignment of superlative clinical services across sites, programs and divisions, with a focus on integration with research and educational activities.

Send letter and CV to:  
**David Silbersweig, M.D.**  
**Chair of Psychiatry and the Institute  
for the Neurosciences**

**Department of Psychiatry**  
**Brigham and Women's Hospital**  
**75 Francis Street, Boston, MA 02115**

**E-mail: [dsilbersweig@partners.org](mailto:dsilbersweig@partners.org)**

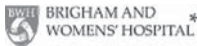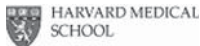

**Brigham and Women's/Faulkner Hospitals are equal opportunity/affirmative action employers with strong institutional commitments to diversity in their faculty. Women and minority candidate are particularly encouraged to apply.**

# Science and Psychiatry

## Groundbreaking Discoveries in Molecular Neuroscience

Solomon H. Snyder, M.D.

Foreword by Eric R. Kandel, M.D.

With Commentaries by Eric J. Nestler, M.D., Ph.D.,  
Charles B. Nemeroff, M.D., Ph.D., George K. Aghajanian, M.D.,  
Carol A. Tamminga, M.D., Herbert Y. Meltzer, M.D., Robert M.  
Post, M.D., Anne Young, M.D., Ph.D., Joseph T. Coyle, M.D.,  
Samuel H. Barondes, M.D., and Nancy C. Andreasen, M.D., Ph.D.

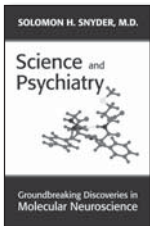

*Science and Psychiatry* is a collection of some of his best scientific papers, publications ranging over forty years that represent important advances in psychopharmacology and molecular biology. Audacious and unanticipated when they first appeared, these papers opened up new areas of understanding and revolutionized the modern study of the brain. Republished here, they show why fundamental research into the “messengers of the mind” is as essential for clinicians as for researchers.

2008 • 513 pages • ISBN 978-1-58562-273-3 • Hardcover • \$70.00 • Item #62273

Order Online: [www.appi.org](http://www.appi.org)

Toll Free: 1-800-368-5777 ■ Fax: 703-907-1091 ■ Email: [appi@psych.org](mailto:appi@psych.org)

American  
Psychiatric  
Publishing, Inc.

The First and Last Word in Psychiatry

1000 Wilson Boulevard, Suite 1825, Arlington, VA 22209-3901

Priority Code AH936QR

# Handbook of Psychiatric Measures, Second Edition

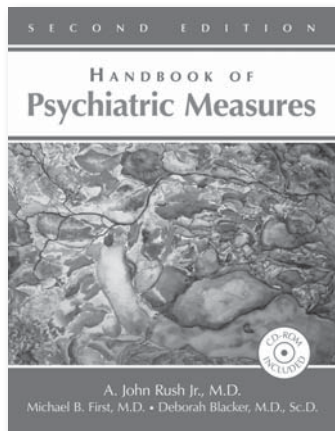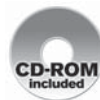

**Edited by A. John Rush Jr., M.D., Michael B. First, M.D.,  
and Deborah Blacker, M.D., Sc.D.**

*The Handbook of Psychiatric Measures* offers a concise summary of key evaluations that clinicians can use in daily practice to enhance the quality of patient care in terms of both diagnosis and assessment of outcomes. Comprising a wide range of methods available for assessing persons with mental health problems, it contains more than 275 rating methods, from the Abnormal Involuntary Movement Scale to the Zung Self-Rating Depression Scale.

2008 • 864 pages • ISBN 978-1-58562-218-4 • Hardcover • \$195.00 • Item #62218

Order Online: [www.appi.org](http://www.appi.org) • Phone: 1-800-368-5777

Fax: 703-907-1091 • Email: [appi@psych.org](mailto:appi@psych.org) Priority Code AH935

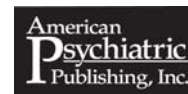

*The First and Last Word in Psychiatry*

# A Vital Resource That Will Help You See and Learn How Psychiatric Illness Affects the Brain

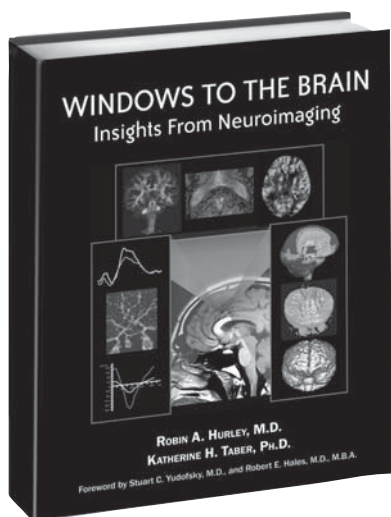

## **WINDOWS to the BRAIN** Insights From Neuroimaging

Robin A. Hurley, M.D., and Katherine H. Taber, Ph.D.  
Foreword by Stuart C. Yudofsky, M.D., and  
Robert E. Hales, M.D., M.B.A.

Windows to the Brain is the only book to synthesize neuroanatomical and imaging research as it pertains to selected neuropsychiatric diseases, containing all of the "Windows to the Brain" papers published from 1999-2006 in the Journal of Neuropsychiatry and Clinical Neurosciences. These reader-friendly summaries by more than sixty contributors present modern imaging techniques that assist in the diagnosis of neuropsychiatric illness, enhanced by easily understood color graphics of the neuroanatomical circuits of behavior, memory, and emotion. They provide a basic understanding of how to apply a variety of imaging techniques to the study of adult neuropsychiatric disease and how to use neuroimaging to assist in diagnostic work-ups for conditions ranging from sleep disorders to epilepsy to borderline personality.

Integrated, color-coded graphics present functional anatomical information in a manner that promotes understanding and use in clinical practice, while the text encompasses a wide range of diseases and injuries across the adult lifespan. The book is organized into four sections that will help readers increase their appreciation of the wide range of research and clinical applications for imaging in neuropsychiatry: chapters on imaging techniques discuss underlying principles, strengths and weaknesses, and applications; chapters on specific diseases demonstrate a range of investigative techniques; anatomy/circuit chapters focus on particular brain structures or functional neuropsychiatric circuits; and final chapters present image-based approaches to understanding or selecting treatment options. Some of the applications described are:

- fMRI in posttraumatic stress disorder that reveals the delicate balance between the structures of the emotion and memory tracks
- High-resolution MRI and nuclear imaging that distinguish between panic disorder and simple partial seizure disorder
- Functional imaging studies that detect corticobasal degeneration, as a means of better understanding dementia
- Newer imaging techniques in identifying progressive multifocal leukoencephalopathy, to enable more rapid and reliable tailoring of individual therapy for HIV
- Functional neuroimaging in the study of fear, in order to better understand and treat anxiety-based psychiatric disorders
- Neuroimaging studies in conversion disorder, showing implications for the disruption of selfhood in dissociative identity disorder and schizophrenia
- FDG-PET scans to look for predictors of treatment response in childhood-onset obsessive-compulsive disorder

American  
**Psychiatric**  
Publishing, Inc.

2008 • 263 pages • ISBN 978-1-58562-302-0 • Hardcover • \$79.00 • Item #62302

To order call: **1-800-368-5777** or visit our website: **www.appi.org**

Please reference priority code AH933 when ordering.

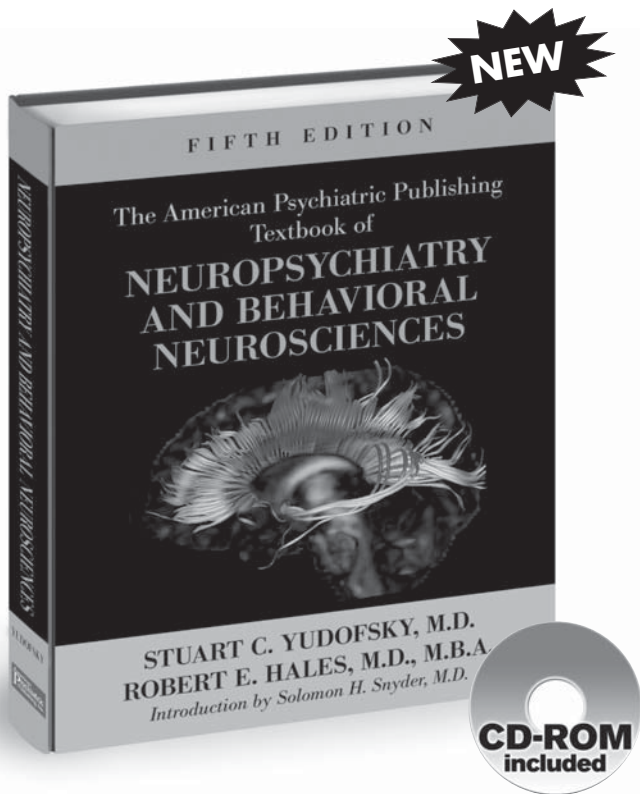

# The Fifth Edition of The American Psychiatric Publishing Textbook of Neuropsychiatry and Behavioral Neurosciences

Stuart C. Yudofsky, M.D., and Robert E. Hales, M.D., M.B.A.  
With Introduction by Solomon H. Snyder, M.D.

Since the publication of the Fourth Edition of this *Textbook* six years ago, we have continued to witness explosive growth in our knowledge base in structural and functional brain imaging, electrophysiology and electrodiagnosis, cellular and molecular biology, genetics, and neuropsychopharmacology—to name just a few. To convey this intensified focus in neurosciences and to acknowledge the recognition by the American Neuropsychiatric Association and by the United Council for Neurological Subspecialties of new subspecialty status in neuropsychiatry and behavioral neurology, the editors have

added “*Behavioral Neurosciences*” to the title of this seminal work, while increasing its already impressive clinical utility and practicality. Among the many highlights of the Fifth Edition are:

- An extensively updated chapter on the cellular and molecular biology of the neuron
- An expanded chapter on the epidemiology and genetics of neuropsychiatric disorders
- An extensively revised and expanded chapter on the neuropsychiatric aspects of delirium
- A comprehensive revision and expansion of the chapter on clinical and functional neuroimaging

In this volume’s five main sections, you’ll find *basic principles of neuroscience, assessment, symptomatology, neuropsychiatric disorders, and neuropsychiatric treatments*

## CD-ROM Included!

The accompanying CD in PowerPoint presentation format contains a wealth of material to enhance classroom presentation, study, and clinical use. It includes all 170 tables and all 250 figures, many in color, with their explanatory legends, easy to access and organized chapter by chapter with context provided—plus, Highlights for the Clinician summarizing the key clinical points for each chapter; locator menus; useful links; and a topic outline.

2008 • 1,360 pages • ISBN 978-1-58562-239-9 • Hardcover • \$285.00 • Item #62239

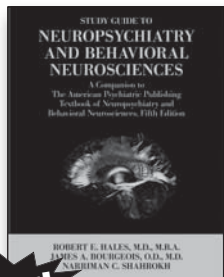

## Study Guide to Neuropsychiatry and Behavioral Neurosciences

A Companion to The American Psychiatric Publishing Textbook of Neuropsychiatry and Behavioral Neurosciences, Fifth Edition

Robert E. Hales, M.D., M.B.A.,  
James A. Bourgeois, O.D., M.D., and  
Narriman C. Shahrokh

*Study Guide to Neuropsychiatry and Behavioral Neurosciences* is a question-and-answer companion that allows you to evaluate your mastery of the subject matter as you progress

through the corresponding textbook. The *Study Guide* is made up of 246 questions divided into individual quizzes of 5-10 questions each that correspond to chapters in *The American Psychiatric Publishing Textbook of Neuropsychiatry and Behavioral Neurosciences*, Fifth Edition. Questions are followed by an Answer Guide that references relevant text (including the page number) in the *Textbook* to allow quick access to needed information. Each answer is accompanied by a discussion that addresses not only the correct response but also explains why other responses are not correct.

2008 • 202 pages • ISBN 978-1-58562-303-7 • Paperback  
\$49.00 • Item #62303



**American Neuropsychiatric Association**

21<sup>st</sup> Annual Meeting

The Marriott Tampa Waterside Hotel and Marina

March 17-20, 2010

# Tampa

ANPA's 21<sup>st</sup> Annual Meeting

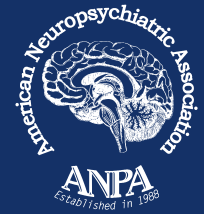

Florida

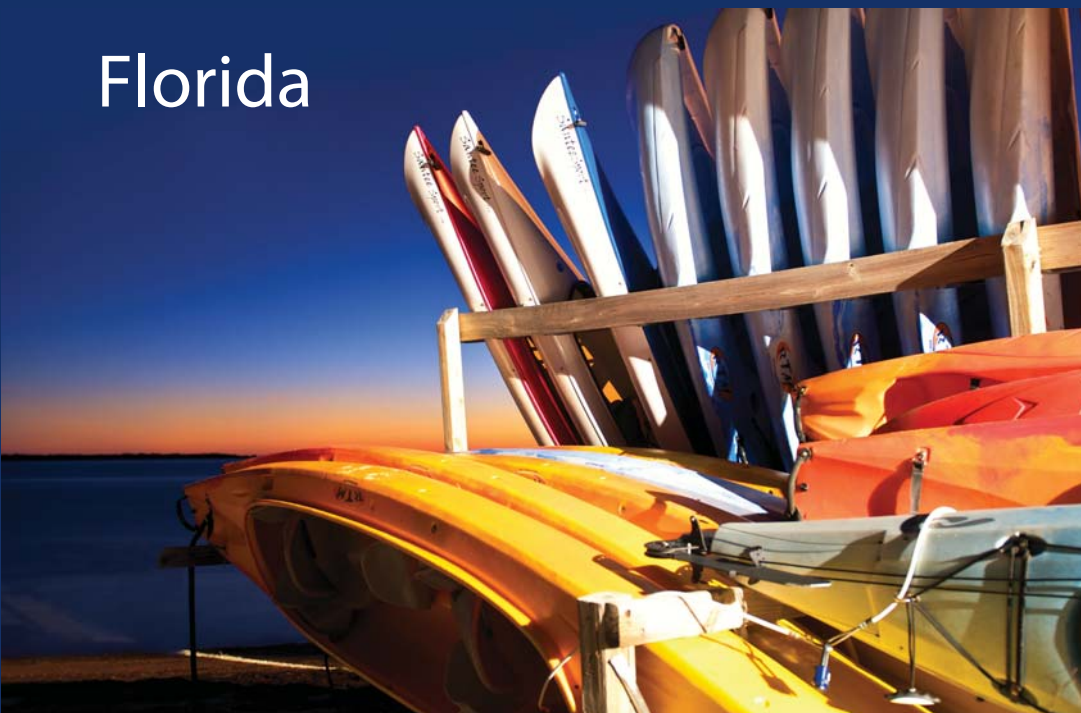

Accepted abstracts will be published on-line in the Spring 2010 issue of the *Journal of Neuropsychiatry and Clinical Neurosciences*.

Travel awards may be given to one or more of the young investigators submitting the most promising abstracts.

Deadline for receipt of abstracts is October 21, 2009.

Complete submission instructions will be available June 1, 2009 at: [www.anpaonline.org](http://www.anpaonline.org)

Meeting information can be found on the ANPA web site: [www.anpaonline.org](http://www.anpaonline.org) as it becomes available.

## Call for Abstracts

You are invited to submit abstracts reporting new research and challenging clinical cases for poster sessions or platform presentations.

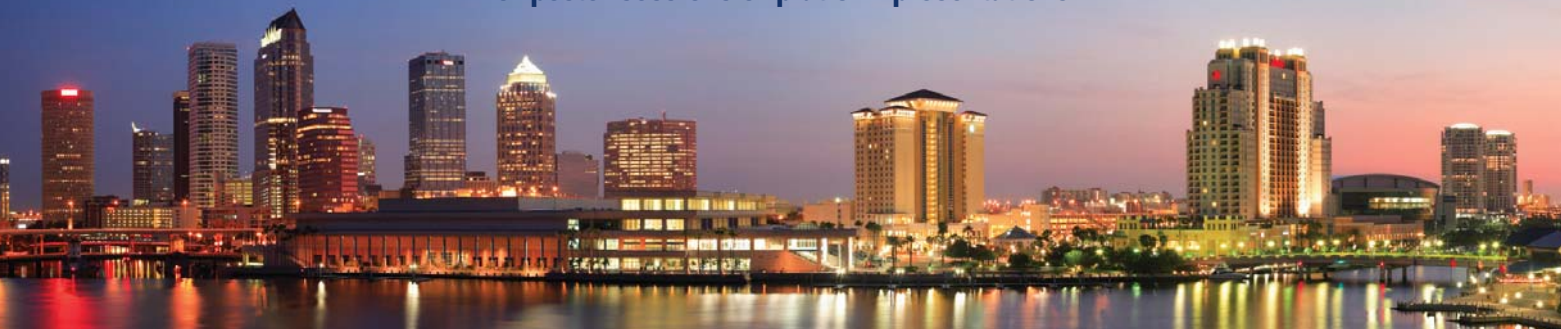

# American Neuropsychiatric Association

The American Neuropsychiatric Association (ANPA), established in 1988, is an organization of professionals in neuropsychiatry, behavioral neurology, neuropsychology and the clinical neurosciences. Our mission is to improve the lives of people with disorders at the interface of psychiatry and neurology through clinical care, education, advocacy and research.

The strength of the organization is our diversity of membership, which is comprised of professionals in neuropsychiatry, behavioral neurology, neuropsychology, neuroradiology, neuropathology, and neurosurgery as well as the basic neurosciences, who share clinical and/or academic interests in neuropsychiatry. The interdisciplinary nature of the membership encourages collaborations among educators, clinicians, researchers, students and trainees in research presentations, symposia, workshops and/or continuing education courses. *The Journal of Neuropsychiatry and Clinical Neurosciences (JNCN)* is the official publication of the organization, and is a benefit of membership.

ANPA holds an annual scientific meeting and provides up to 30 CME/CE credits. Members are encouraged to submit their work for presentation at these annual meetings. Travel awards are available for promising young investigators. Annual meeting abstracts and proceedings are published in *JNCN*.

ANPA has been actively engaged in efforts toward creation of subspecialty certification for neuropsychiatry including developing a core curriculum and guidelines for training in neuropsychiatry. On June 30, 2004 Behavioral Neurology & Neuropsychiatry was approved as a single subspecialty through the Unified Council for Neurologic Subspecialties (UCNS).

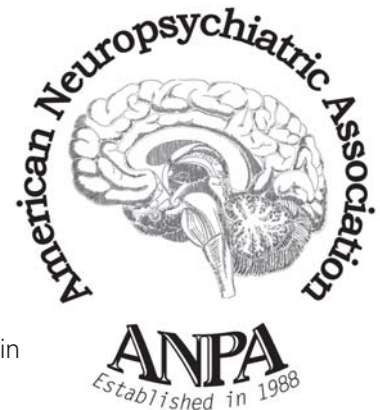

## Contact Information

### Benefits of Membership

- Subscription to *The Journal of Neuropsychiatry and Clinical Neurosciences (JNCN)*
- Discount on subscriptions to PsychiatryOnline.com including DSM Premium and DSM Premium Plus
- Opportunities for presentation at the annual meeting with accepted abstracts published in the *JNCN*
- Significantly reduced registration fees at the annual meeting
- Newsletters, news updates, information on job and training opportunities, research and meeting information on the ANPA web site: [www.anpaonline.org](http://www.anpaonline.org)
- Discounted membership and meeting registration fees for trainees
- Collaboration in clinical, educational and research activities and the opportunity to interact with senior colleagues
- Opportunity to participate on committees and in the future leadership of ANPA

Website:  
[www.anpaonline.org](http://www.anpaonline.org)

Email:  
[anpa@osu.edu](mailto:anpa@osu.edu)

Phone:  
614-447-2077

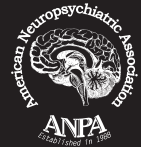

**Join ANPA Now!**

**Don't miss ANPA's 21<sup>st</sup> Annual Meeting  
Tampa Marriott Waterside Hotel and Marina  
March 17 – 20, 2010**

## Tampa, Florida

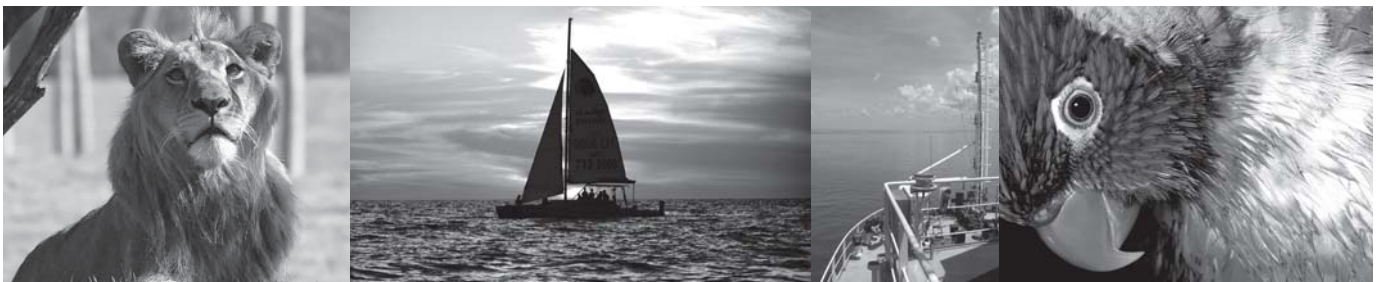

Join online at: <http://www.anpaonline.org/10117.cfm>
