# PsychiatryOnline.com

Online access to a premier collection of psychiatric resources

Just added to  
**PsychiatryOnline**

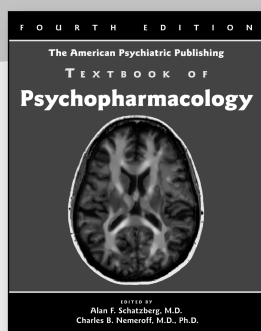

**The American Psychiatric  
Publishing Textbook of  
Psychopharmacology,  
Fourth Edition**

Edited by Alan F. Schatzberg, M.D.,  
and Charles B. Nemeroff, M.D., Ph.D.

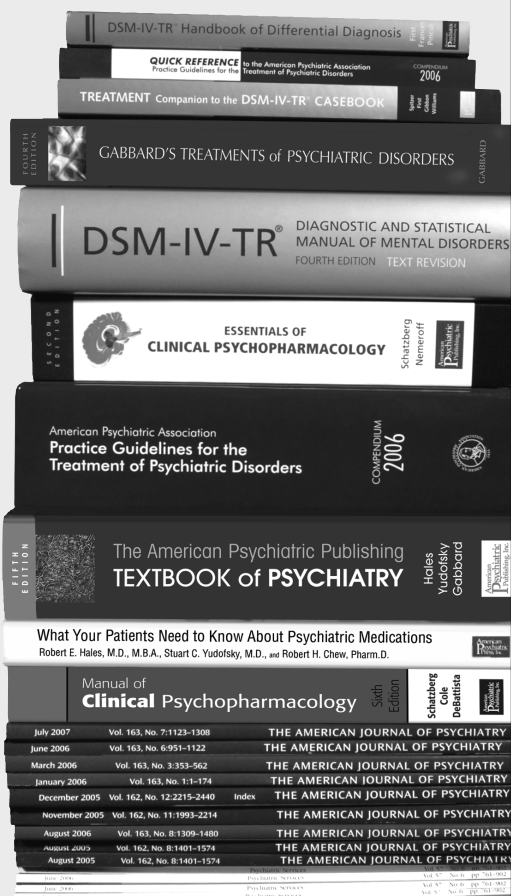

**PsychiatryOnline.com** is a powerful website that features *DSM-IV-TR*<sup>®</sup> and *The American Journal of Psychiatry* as the cornerstones of an unsurpassed collection of psychiatric references, including books, journals, and self-assessment tools. Much more than simply books and journals presented online, **PsychiatryOnline.com** features sophisticated searching and indexing tools that enable you to quickly target all the information you need.

Whether your needs are clinical, learning, or research, **PsychiatryOnline.com** provides access to the information critical to your work and everyday practice with convenient features such as:

- Search and linking tools that let you find relevant book chapters and journal articles quickly.
- Unlimited downloads to PDA so you can take book sections with you wherever you go.
- Copy and paste functions for easy creation of tables and presentations.
- Citation exports to most reference manager formats.
- Printer-friendly views that mean no reformatting when you need a hard copy.
- Saved searches and bookmarked chapters to make it easy to return to topics of interest.
- Email page feature that allows you to share the information with colleagues.

#### Other subscriber benefits include:

- Book of the Month—You'll get access each month to a FREE PDF version of a featured book from American Psychiatric Publishing, Inc.
- The most up-to-date versions available including NEW *American Psychiatric Association Practice Guidelines* as they are released.
- PLUS Guideline Watches and DSM-IV-TR Coding Updates, as soon as they are available.
- American Psychiatric Association Members receive \$110 discount off a regular priced subscription. APA Members-in-Training (MITs) can save even more!

Subscribe TODAY, visit  
**www.PsychiatryOnline.com.**

Please enter priority code AH904AA when completing your request.

Interested in an institutional subscription? Please contact us at [institutions@psych.org](mailto:institutions@psych.org) or call 1-800-368-5777 ext. 8538 or 703-907-8538 for more information and a subscription rate quote.

American  
**Psychiatric**  
Publishing, Inc.

The First and Last Word in Psychiatry

AH904
